# Supplementary material
Source: bioRxiv or medRxiv preprint supplement (https://www.medrxiv.org/highwire/filestream/93428/field_highwire_adjunct_files/0/2020.08.15.20175844-1.pdf)
Supplement: Supplementary file [file 2020.08.15.20175844-1.pdf]

## Supplementary Data

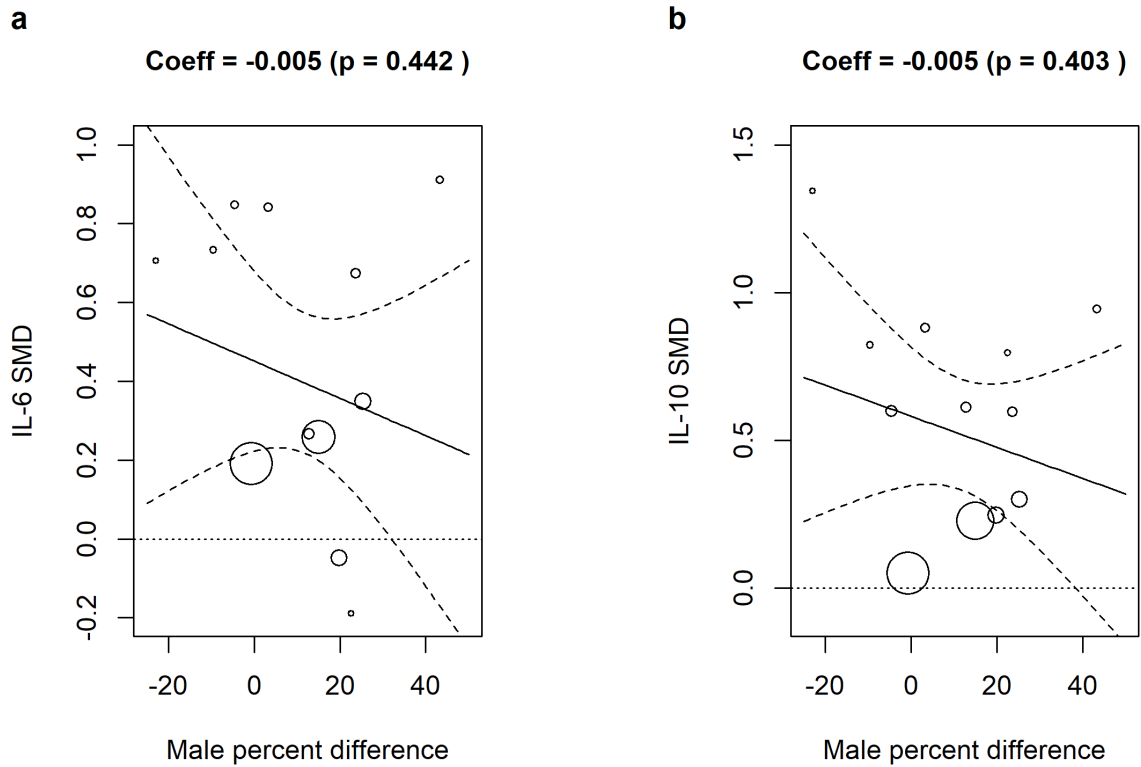

**Figure S 1: Meta-regression bubble plots of (a) IL-6 and (b) IL-10 SMD with percent difference of male patients across severe and non-severe groups**

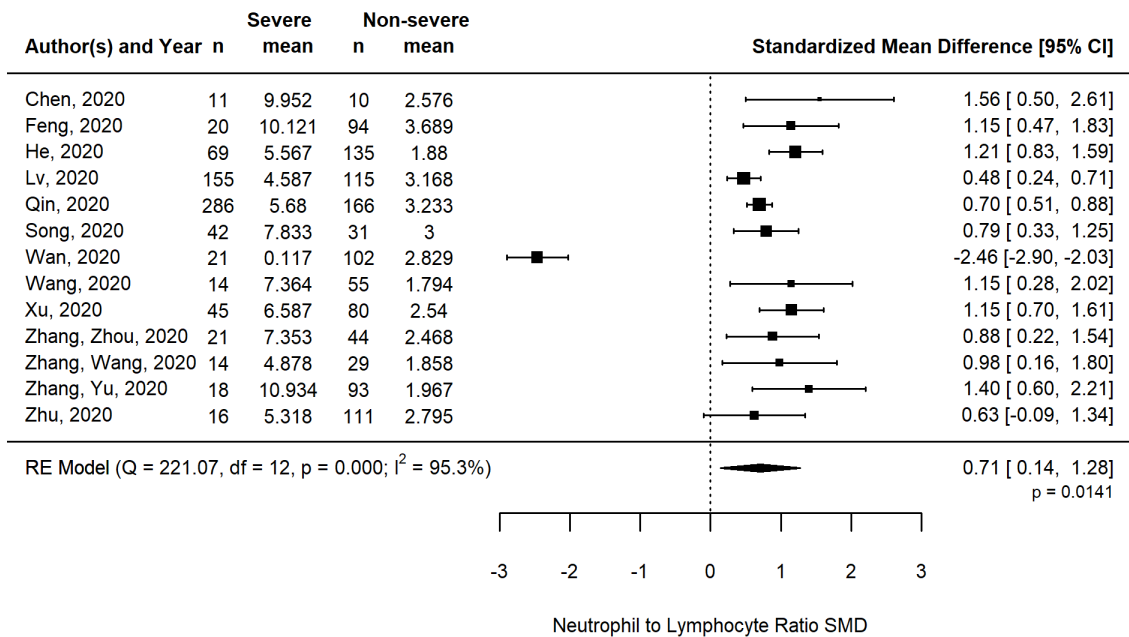

**Figure S 2: Standardized Mean Difference of Neutrophil-to-Lymphocyte ratio across severe and non-severe patients**

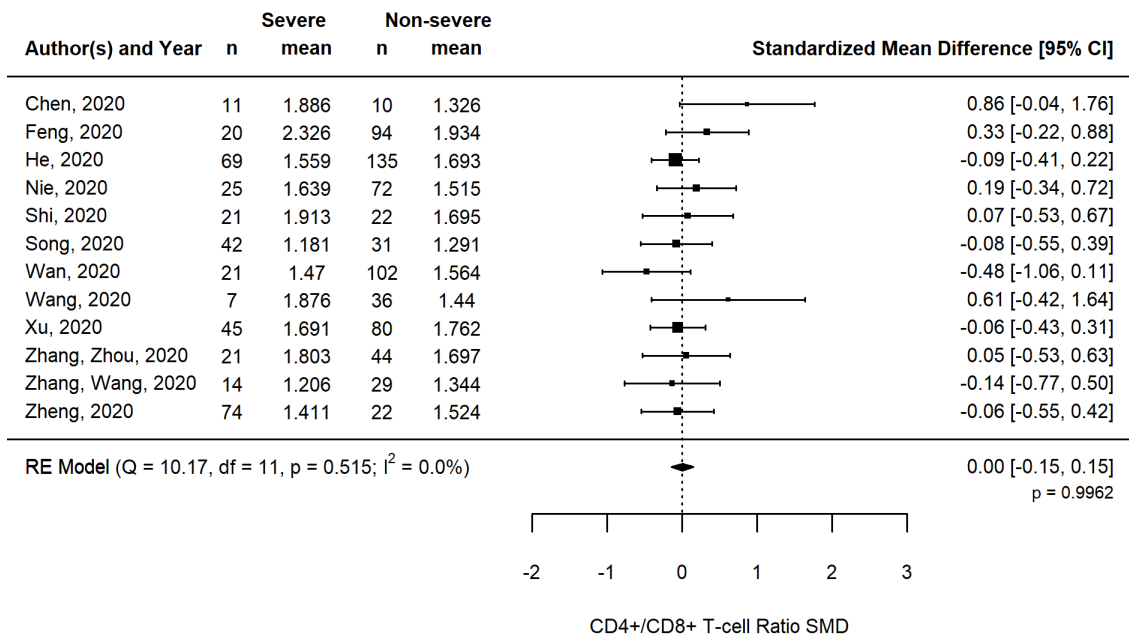

**Figure S 3: Standardized Mean Difference of CD4<sup>+</sup>/CD8<sup>+</sup> T-cell count ratio across severe and non-severe patient groups**

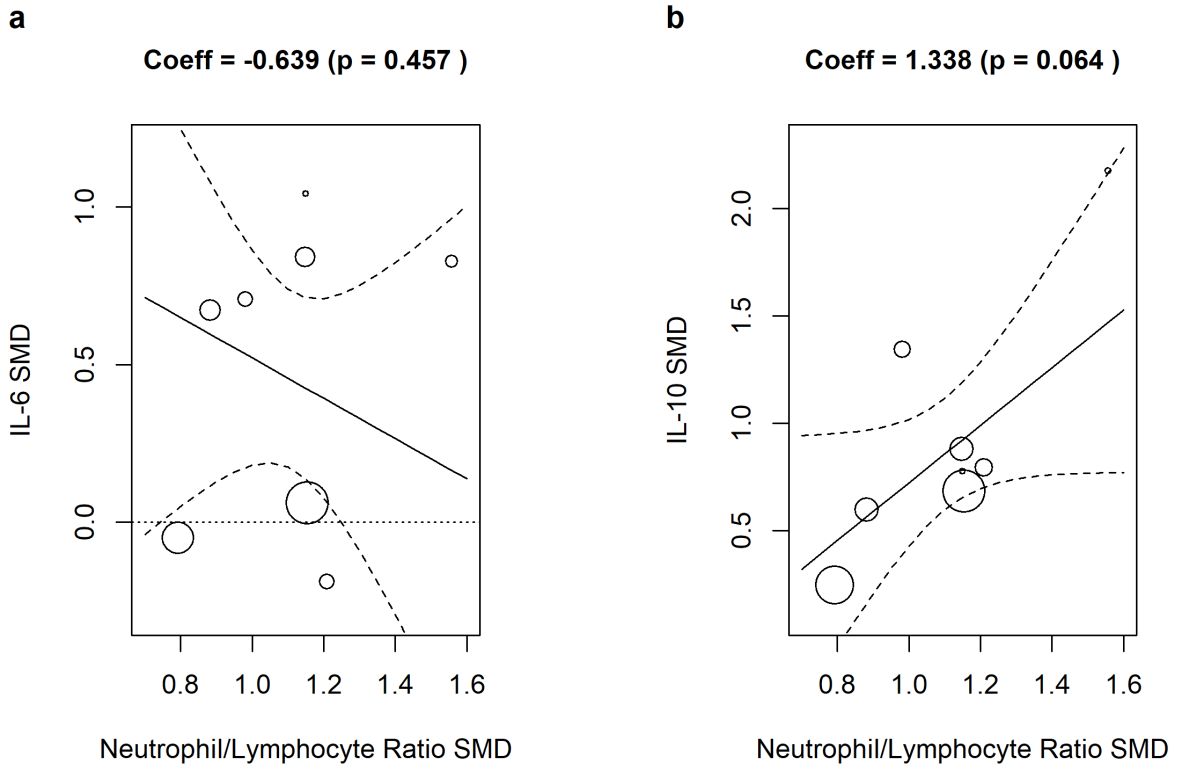

**Figure S 4: Meta-regression bubble plots of (a) IL-6 and (b) IL-10 SMD with neutrophil to lymphocyte ratio across severe and non-severe groups**

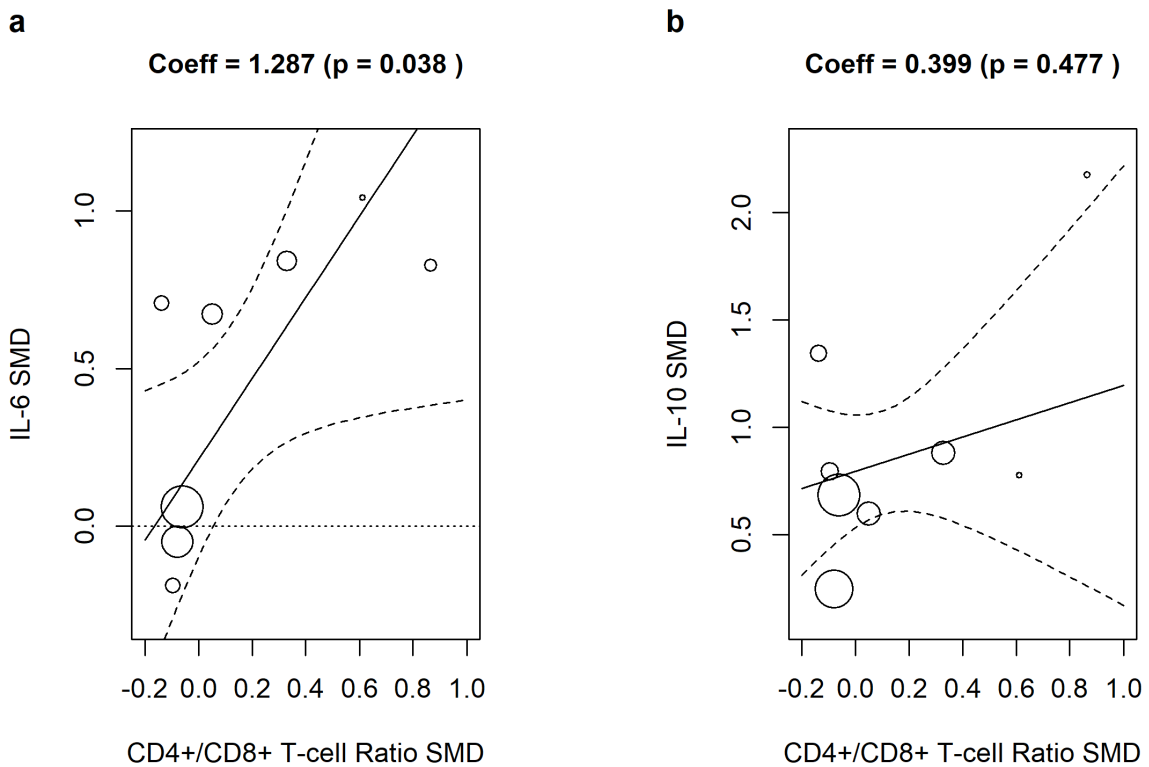

**Figure S 5: Meta-regression bubble plots of (a) IL-6 and (b) IL-10 SMD with CD4+/CD8+ T-cell count ratio across severe and non-severe groups**

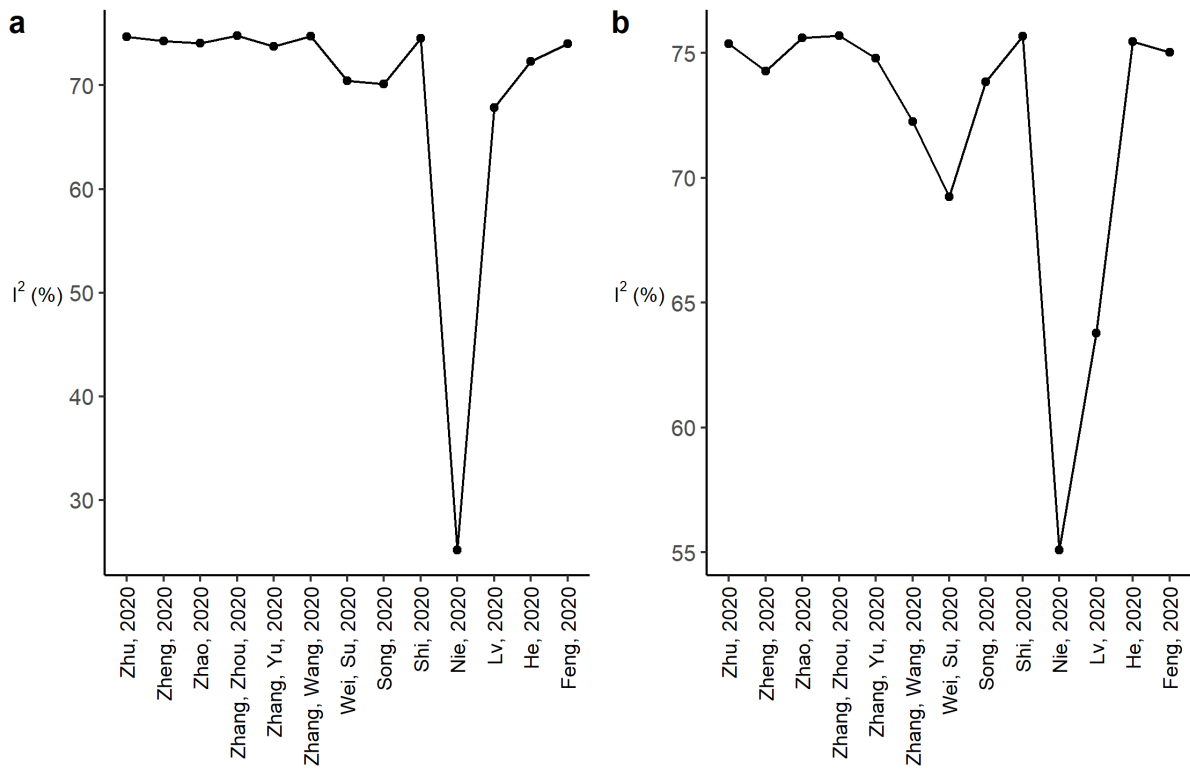

**Figure S 6: Sensitivity analysis for (a) IL-6 and (b) IL-10 meta-analysis**
